# Supplementary material for: Effects and individual response of continuous and interval training on adiponectin concentration, cardiometabolic risk factors and physical fitness in overweight adolescents
Source: Research Square preprint supplement (doi:10.21203/rs.3.rs-2409215/v1), 2023-01-09
Supplement: Supplementary file 1 [file 4fc4a2ea19e5fd61272afed6.docx]

Table 1 - Comparison between baseline and post, effect size and clinical inference between HIIT, MICT and CG after 12 weeks of intervention

| **Variables** | **HIIT (n=13)** | | | | |  | **MICT (N=15)** | | | | |  | **CG (n=24)** | | | | |
| --- | --- | --- | --- | --- | --- | --- | --- | --- | --- | --- | --- | --- | --- | --- | --- | --- | --- |
| **Baseline** | **Post** | **ES** | **CI** | **p** |  | **Baseline** | **Post** | **ES** | **CI** | **p** |  | **Baseline** | **Post** | **ES** | **CI** | **p** |
| **Anthropometric and body composition** | | | | | | | | | | | | | | | | | |
| BMI-z | 2.36±1.0 | 2.25±1.0 | -0.11 | T | **0.005** |  | 2.00±0.8 | 1.97±0.8 | -0.04 | T | 0.298 |  | 2.09±0.8 | 2.02±0.8 | -0.08 | T | **0.050** |
| TMI (kg·m-3) | 17.7±3.0 | 17.4 ±3.0 | -0.10 | T | **0.005** |  | 16.8±1.8 | 16.7±1.8 | -0.03 | T | 0.570 |  | 17.3±3.3 | 17.1±3.4 | -0.05 | T | 0.055 |
| WC (cm) | 98.5±9.9 | 88.5±9.2 | -0.12 | T | 0.122 |  | 91.4±10.3 | 84.2±10.0 | 0.02 | T | 0.628 |  | 94.1±10.9 | 83.8±10.1 | 0.02 | T | 0.631 |
| WHtR | 0.55±0.06 | 0.54±0.07 | -0.19 | T | **0.007** |  | 0.53±0.06 | 0.53±0.06 | -0.02 | T | 0.610 |  | 0.51±0.06 | 0.51±0.07 | 0.00 | T | 1.000 |
| Fat mass (kg) | 27.0±7.2 | 26.6±8.4 | -0.05 | T | 0.500 |  | 23.8±6.1 | 23.9±5.6 | 0.02 | T | 0.787 |  | 25.8±9.1 | 24.8±9.8 | -0.11 | T | **0.035** |
| Fat-free mass (kg) | 49.6±9.1 | 50.5±8.3 | 0.10 | T | 0.093 |  | 43.9±6.7 | 44.8±7.7 | 0.12 | T | 0.071 |  | 48.8±6.9 | 49.9±7.3 | 0.16 | T | **0.016** |
| **Clinics and metabolic variables** | | | | | | | | | | | | | | | | | |
| SBP (mm Hg) | 114.8±15.9 | 114.1±10.1 | -0.04 | T | 0.865 |  | 107.6±11.5 | 109.8±10.7 | 0.19 | T | 0.395 |  | 117.1±10.7 | 114.9±8.8 | -0.20 | PB | 0.206 |
| DBP (mm Hg) | 72.5±13.9 | 68.3±7.9 | -0.31 | PB | 0.286 |  | 69.3±11.2 | 66.0±7.5 | -0.29 | PB | 0.349 |  | 66.1±8.6 | 64.6±6.9 | -0.20 | PB | 0.136 |
| TC (mg·dL-1) | 177.7±35.8 | 160.4±30.3 | -0.48 | **B** | **0.034** |  | 171.6±36.1 | 164.8±24.5 | -0.19 | T | 0.365 |  | 157.4±23.6 | 148.7±24.4 | -0.37 | PB | **0.003** |
| HDL-c (mg·dL-1) | 57.5±10.1 | 52.6±9.9 | -0.50 | **H** | 0.188 |  | 52.3±9.0 | 46.6±9.6 | -0.64 | **H** | **0.048** |  | 52.1±9.8 | 49.3±8.5 | -0.28 | PH | **0.004** |
| LDL-c (mg·dL-1)ǂ | 97.5±29.3 | 84.1±28.1 | -0.46 | **B** | **0.050** |  | 97.6±32.1 | 92.6±26.3 | -0.16 | T | 0.796 |  | 88.1±22.7 | 82.7±22.4 | -0.24 | PB | 0.221 |
| TG (mg·dL-1)ǂ | 113.6±55.9 | 117.7±52.9b | 0.07 | T | 0.782 |  | 107.5±50.7 | 131.8±62.0b | 0.48 | **H** | 0.197 |  | 86.3±33.5 | 83.3±33.0 | -0.09 | T | **0.041** |
| Glucose (mg·dL-1) | 84.7±8.3 | 85.5±8.7 | 0.09 | T | 0.811 |  | 84.3±8.2 | 83.6±5.3 | -0.08 | T | 0.789 |  | 82.2±6.4 | 82.3±8.3 | 0.02 | T | 0.901 |
| Insulin (μUI·mL-1)ǂ | 13.0±9.5 | 13.6±8.4 | 0.06 | T | 0.405 |  | 17.0±19.7 | 13.6±5.9 | -0.17 | T | 0.067 |  | 10.8±3.7 | 12.4±5.8 | **0.45** | **H** | 1.000 |
| HOMA-IRǂ | 2.79±2.2 | 2.94±2.1 | 0.07 | T | 0.405 |  | 3.77±5.0 | 2.80±1.2 | -0.19 | T | 0.796 |  | 2.21±0.8 | 2.58±1.4 | **0.43** | **H** | 0.683 |
| QUICKI | 0.340±0.03 | 0.334±0.02 | -0.18 | T | 0.274 |  | 0.333±0.03 | 0.333±0.02 | -0.01 | T | 0.958 |  | 0.343±0.02 | 0.339±0.02 | -0.24 | PH | 0.167 |
| ADIPO (µg·mL-1)ǂ | 6.31±2.2 | 6.39±3.4 | 0.03 | T | 0.782 |  | 6.10±3.6 | 6.84±5.0 | 0.21 | PB | 0.067 |  | 7.40±4.0 | 8.86±8.6 | 0.37 | PB | 1.000 |
| CRP (mg·L-1)ǂ | 2.35±1.4 | 2.29±3.3 | -0.05 | T | **0.013** |  | 2.98±1.9 | 3.15±2.9 | 0.09 | T | 0.600 |  | 3.30±8.7 | 2.25±3.0 | -0.12 | T | **0.004** |
| **Cardiorespiratory and muscular fitness** | | | | | | | | | | | | | | | | | |
| HRrest (bpm) | 83.8±11.1a | 83.5±13.8 | -0.02 | T | 0.944 |  | 86.5±11.8a | 88.0±9.0 | 0.12 | T | 0.510 |  | 74.4±10.4 | 81.6±11.7 | **0.69** | **H** | **<0.001** |
| VO2peak (L·min-1) | 2.50±0.6 | 2.87±0.6 | 0,61 | **B** | **<0.001** |  | 2.16±0.4 | 2.37±0.4 | 0.50 | **B** | **0.008** |  | 2.52±0.4 | 2.60±0.4 | 0.21 | PB | 0.130 |
| VO2peak (kg·mL·min-1) | 32.6±5.8 | 37.5±5.8 | 0,85 | **VB** | **<0.001** |  | 32.1±4.8 | 35.4±5.9 | 0.69 | **B** | **0.007** |  | 34.3±6.0 | 35.2±4.6 | 0.16 | T | 0.248 |
| HGS-right (kg) | 23.4±5.6a | 26.3±6.3b | 0,52 | **B** | **0.013** |  | 20.9±4.4a | 24.1±5.5b | 0.74 | **B** | **<0.001** |  | 30.6±6.6 | 30.2±6.7 | -0.06 | T | 0.565 |
| HGS-left (kg) | 24.1±7.0a | 25.7±6.9b | 0,22 | **PB** | **0.008** |  | 20.4±4.3a | 22.7±4.5b | 0.54 | **B** | **0.011** |  | 29.6±6.7 | 30.3±6.2 | 0.11 | T | 0.144 |
| ABD (rep) | 25.3 ± 14.1 | 29.6 ± 13.9 | 0,31 | **PB** | **0.034** |  | 19.3±7.0 | 22.5±9.1 | 0.46 | **B** | **0.030** |  | 23.1±9.4 | 21.4 ±10.5 | -0.17 | T | 0.232 |

Note: BMI-z=body mass index z-score; TMI=triponderal mass index; WC=waist circumference; WHtR=waist-to-height ratio; SBP=systolic blood pressure; DPB=diastolic blood pressure; TC=total cholesterol; HDL-c=high-density lipoprotein; LDL-c=low-density lipoprotein; TG=triglycerides; HOMA-IR=homeostasis model assessment of insulin resistance; QUICKI=quantitative insulin sensitivity check index; ADIPO=adiponectin; CRP=C-reactive protein; HRrest=resting heart rate; VO2peak=peak oxygen consumption; HGS-right=right handgrip strength; HGS-left=left handgrip strength; ABD=abdominal resistance; rep=repetition; ES=effect size; CI=clinical inference; T=trivial; PB=possibly beneficial; B=beneficial; H=harmful; VB=very beneficial; PH=possibly harmful; ǂ =non-parametric distribution; a=difference CG-baseline; b=difference CG-post; bold=significant statistical difference.
